# Supplementary material for: Single-phase dual emissive Cu:CdS–ZnSe core–shell nanocrystals with “zero self-absorption” and their application in white light emitting diodes
Source: Royal Society of Chemistry journal article supplement (doi:10.1039/c5tc00374a), 2015-01-01
Supplement: c5tc00374a1.pdf [file c5tc00374a1.pdf]

## Supporting Information

### **Single-phase Dual Emissive Cu:CdS/ZnSe Core/Shell Nanocrystals with “Zero Self-absorption” and Their Application in White Light Emitting Diodes**

ZhuoleiZhang,<sup>a</sup>SiyuanLuan,<sup>a</sup>KekeHuang,<sup>a</sup> Ying Zhang,<sup>a</sup> Zhan Shi,<sup>a</sup>RenguoXie,<sup>a,\*</sup> and  
WenshengYang<sup>b</sup>

<sup>a</sup> State Key Laboratory of Inorganic Synthesis and Preparative Chemistry, College of Chemistry, Jilin University, Changchun 130012, China.

<sup>b</sup>State Key Laboratory for Supramolecular Structure and Materials, College of Chemistry, Jilin University, Changchun 130012, China

E-mail: renguoxie@jlu.edu.cn

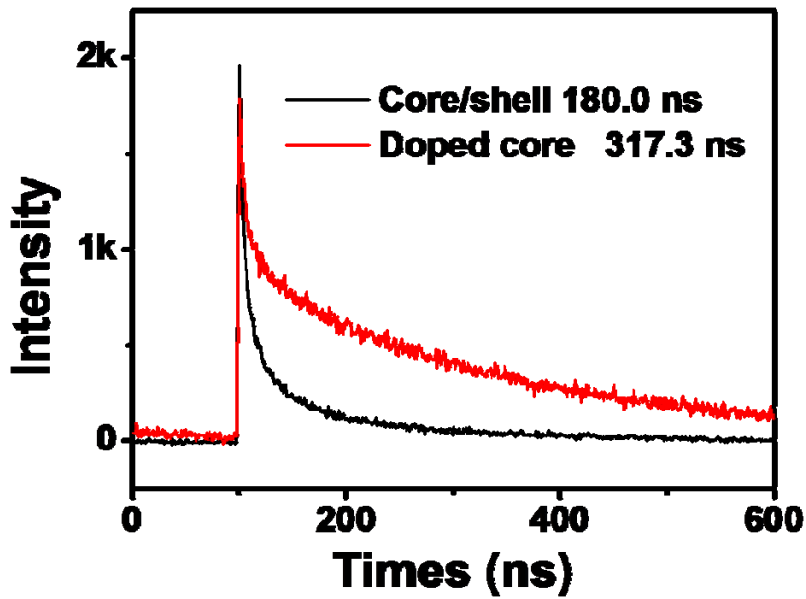

Figure S1. Time-resolved type-II PL and doped PL decay traces of the sample recorded at the emission wavelength of 680 and 520 nm, respectively.

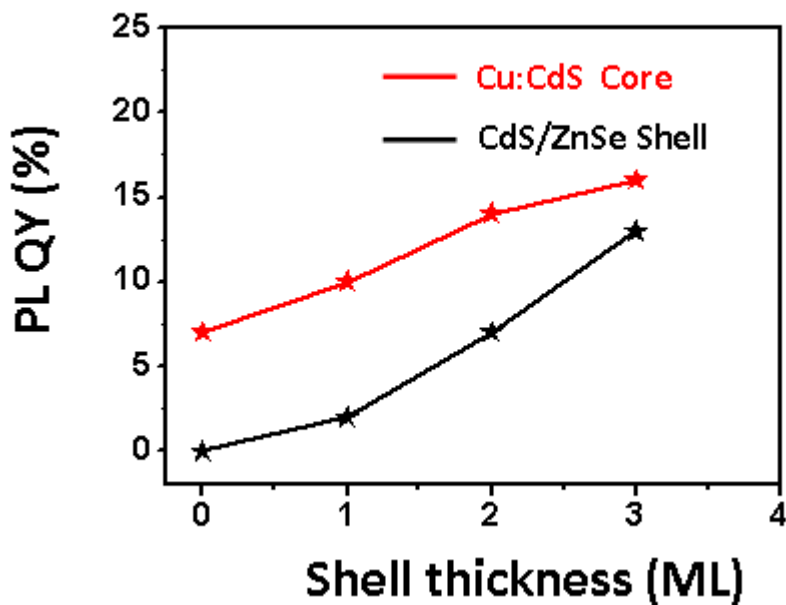

Figure S2. Quantum efficiency of Cu doped CdS/ZnSe NCs with different shell thickness (ZnSe monolayer).
